# Supplementary material
Source: publisher figshare collection journal article supplement (https://springernature.figshare.com/articles/dataset/_/21523908)
Supplement: Supplementary file 1 [file 1]

## Sheet: Sheet1
Country	Mean GDP per capita during 2010-2020(US $)	std
Cambodia	1202.77	284.201
Pakistan	1230.2	136.855
Myanmar	1249.98	133.54
Bangladesh	1297.91	425.732
India	1709.94	261.643
Viet Nam	2109.58	476.469
Philippines	2947.98	374.822
Indonesia	3655.1	281.621
Thailand	6298.12	834.209
China	7713.61	1876.51
Brazil	10332	2038.02
America	26157.6	1293.28
South Korea	28935.5	3376.17
Japan	41247.3	4368.49
